# Supplementary material for: Differences in Vaccination Consultation Preferred by Primary Health Care Workers and Residents in Community Settings
Source: MDPI journal article supplement (doi:10.3390/vaccines12050534), 2024-05-14
Supplement: s1 [file s1]

## Supplementary S1. Residents Questionnaire

### I. Socio-demographic information

1. What is your gender?
  - a) male
  - b) female
2. What is your age? \_\_\_\_\_years old
3. What is your highest educational level?
  - a) high school and below
  - b) junior college and above
4. What is your average monthly income?
  - a) less than 5,000 RMB
  - b) more than 5,000 RMB
5. Do you combine the following health conditions [multiple choices]:
  - a) no
  - b) obesity (BMI>30)
  - c) hypertension
  - d) hyperlipidemia
  - e) diabetes
  - f) cardiovascular and cerebrovascular diseases
  - g) chronic lung diseases (such as COPD, chronic pneumonia, etc.)
  - h) chronic liver diseases (such as chronic hepatitis, cirrhosis, etc.)
  - i) chronic kidney disease or neoplasm
  - j) tumor
  - k) immune dysfunction (e.g., AIDS)
  - l) other underlying disease
6. What are your main considerations for vaccination or non-vaccination? Please select the three **most important and rank** them in the order from most important to least important, and fill in the number below: (1) (2) \_(3) \_
  - a) effectiveness of vaccine
  - b) safety of vaccine
  - c) severity of disease
  - d) susceptibility of disease
  - e) media coverage
  - f) time taken
  - g) community (or affiliated unit) requirements
  - h) financial rewards
  - i) advice from others
  - j) vaccination behavior from others
  - k) techniques and attitudes of vaccinators
  - l) vaccination experience

**Instructions:** There will be several exclusive choice questions, each asking you to choose which of two vaccination advice services supplied by health care workers (HCWs) you prefer, you can also choose "Neither" when you really can't make a choice.

7. If the HCWs can provide you with vaccination-related consultation services, which of the following modes do you prefer to use for consultation?
- a) Consultation mode A
  - b) Consultation mode B
  - c) Neither

| Attribute                  | Consulting Mode A                                                                                         | Counseling Mode B                                                                                  |
|----------------------------|-----------------------------------------------------------------------------------------------------------|----------------------------------------------------------------------------------------------------|
| <b>Consultation-led</b>    | Demand (HCWs begin offering counseling services after patients ask about it)                              | Supplier (HCWs take the initiative to ask about vaccination status and offer counseling services)  |
| <b>Consulting duration</b> | <5 minutes                                                                                                | >5 minutes                                                                                         |
| <b>Consulting content</b>  | Specialized (HCWs provide targeted consultations according to the characteristics and needs of residents) | Normalized (HCWs conduct comprehensive but not targeted consultations according to the guidelines) |
| <b>Consulting mode</b>     | Online (e.g. new media or instant messaging)                                                              | Offline (Face-to-face interviews)                                                                  |
| <b>Telephone follow-up</b> | Without follow-up visits                                                                                  | With follow-up visits                                                                              |

8. If the HCWs can provide you with vaccination-related consultation services, which of the following modes do you prefer to use for consultation?
- a) Consultation mode A
  - b) Consultation mode B
  - c) Neither

| Attribute                  | Consulting Mode A                                                                                         | Counseling Mode B                                                                                  |
|----------------------------|-----------------------------------------------------------------------------------------------------------|----------------------------------------------------------------------------------------------------|
| <b>Consultation-led</b>    | Demand (HCWs begin offering counseling services after patients ask about it)                              | Supplier (HCWs take the initiative to ask about vaccination status and offer counseling services)  |
| <b>Consulting duration</b> | >5 minutes                                                                                                | <5 minutes                                                                                         |
| <b>Consulting content</b>  | Specialized (HCWs provide targeted consultations according to the characteristics and needs of residents) | Normalized (HCWs conduct comprehensive but not targeted consultations according to the guidelines) |
| <b>Consulting mode</b>     | Online (e.g. new media or instant messaging)                                                              | Offline (Face-to-face interviews)                                                                  |
| <b>Telephone follow-up</b> | Without follow-up visits                                                                                  | With follow-up visits                                                                              |

9. If the HCWs can provide you with vaccination-related consultation services, which of the following modes do you prefer to use for consultation?

- a) Consultation mode A
- b) Consultation mode B
- c) Neither

| Attribute                  | Consulting Mode A                                                                                         | Counseling Mode B                                                                                  |
|----------------------------|-----------------------------------------------------------------------------------------------------------|----------------------------------------------------------------------------------------------------|
| <b>Consultation-led</b>    | Demandor (HCWs begin offering counseling services after patients ask about it)                            | Supplier (HCWs take the initiative to ask about vaccination status and offer counseling services)  |
| <b>Consulting duration</b> | <5 minutes                                                                                                | >5 minutes                                                                                         |
| <b>Consulting content</b>  | Specialized (HCWs provide targeted consultations according to the characteristics and needs of residents) | Normalized (HCWs conduct comprehensive but not targeted consultations according to the guidelines) |
| <b>Consulting mode</b>     | Offline (Face-to-face interviews)                                                                         | Online (e.g. new media or instant messaging)                                                       |
| <b>Telephone follow-up</b> | Without follow-up visits                                                                                  | With follow-up visits                                                                              |

10. If the HCWs can provide you with vaccination-related consultation services, which of the following modes do you prefer to use for consultation?

- a) Consultation mode A
- b) Consultation mode B
- c) Neither

| Attribute                  | Consulting Mode A                                                                                         | Counseling Mode B                                                                                  |
|----------------------------|-----------------------------------------------------------------------------------------------------------|----------------------------------------------------------------------------------------------------|
| <b>Consultation-led</b>    | Demandor (HCWs begin offering counseling services after patients ask about it)                            | Supplier (HCWs take the initiative to ask about vaccination status and offer counseling services)  |
| <b>Consulting duration</b> | >5 minutes                                                                                                | <5 minutes                                                                                         |
| <b>Consulting content</b>  | Specialized (HCWs provide targeted consultations according to the characteristics and needs of residents) | Normalized (HCWs conduct comprehensive but not targeted consultations according to the guidelines) |
| <b>Consulting mode</b>     | Online (e.g. new media or instant messaging)                                                              | Offline (Face-to-face interviews)                                                                  |
| <b>Telephone follow-up</b> | With follow-up visits                                                                                     | Without follow-up visits                                                                           |

11. If the HCWs can provide you with vaccination-related consultation services, which of the following modes do you prefer to use for consultation?

- a) Consultation mode A
- b) Consultation mode B
- c) Neither

| Attribute | Consulting Mode A | Counseling Mode B |
|-----------|-------------------|-------------------|
|-----------|-------------------|-------------------|

|                            |                                                                                                    |                                                                                                           |
|----------------------------|----------------------------------------------------------------------------------------------------|-----------------------------------------------------------------------------------------------------------|
| <b>Consultation-led</b>    | Demand (HCWs begin offering counseling services after patients ask about it)                       | Supplier (HCWs take the initiative to ask about vaccination status and offer counseling services)         |
| <b>Consulting duration</b> | <5 minutes                                                                                         | >5 minutes                                                                                                |
| <b>Consulting content</b>  | Normalized (HCWs conduct comprehensive but not targeted consultations according to the guidelines) | Specialized (HCWs provide targeted consultations according to the characteristics and needs of residents) |
| <b>Consulting mode</b>     | Online (e.g. new media or instant messaging)                                                       | Offline (Face-to-face interviews)                                                                         |
| <b>Telephone follow-up</b> | With follow-up visits                                                                              | Without follow-up visits                                                                                  |

12. If the HCWs can provide you with vaccination-related consultation services, which of the following modes do you prefer to use for consultation?
- a) Consultation mode A
  - b) Consultation mode B
  - c) Neither

| Attribute                  | Consulting Mode A                                                                                         | Counseling Mode B                                                                                  |
|----------------------------|-----------------------------------------------------------------------------------------------------------|----------------------------------------------------------------------------------------------------|
| <b>Consultation-led</b>    | Demand (HCWs begin offering counseling services after patients ask about it)                              | Supplier (HCWs take the initiative to ask about vaccination status and offer counseling services)  |
| <b>Consulting duration</b> | >5 minutes                                                                                                | <5 minutes                                                                                         |
| <b>Consulting content</b>  | Specialized (HCWs provide targeted consultations according to the characteristics and needs of residents) | Normalized (HCWs conduct comprehensive but not targeted consultations according to the guidelines) |
| <b>Consulting mode</b>     | Offline (Face-to-face interviews)                                                                         | Online (e.g. new media or instant messaging)                                                       |
| <b>Telephone follow-up</b> | With follow-up visits                                                                                     | Without follow-up visits                                                                           |

13. If the HCWs can provide you with vaccination-related consultation services, which of the following modes do you prefer to use for consultation?
- a) Consultation mode A
  - b) Consultation mode B
  - c) Neither

| Attribute               | Consulting Mode A                                                            | Counseling Mode B                                                                                 |
|-------------------------|------------------------------------------------------------------------------|---------------------------------------------------------------------------------------------------|
| <b>Consultation-led</b> | Demand (HCWs begin offering counseling services after patients ask about it) | Supplier (HCWs take the initiative to ask about vaccination status and offer counseling services) |

|                            |                                                                                                           |                                                                                                    |
|----------------------------|-----------------------------------------------------------------------------------------------------------|----------------------------------------------------------------------------------------------------|
| <b>Consulting duration</b> | <5 minutes                                                                                                | >5 minutes                                                                                         |
| <b>Consulting content</b>  | Specialized (HCWs provide targeted consultations according to the characteristics and needs of residents) | Normalized (HCWs conduct comprehensive but not targeted consultations according to the guidelines) |
| <b>Consulting mode</b>     | Offline (Face-to-face interviews)                                                                         | Online (e.g. new media or instant messaging)                                                       |
| <b>Telephone follow-up</b> | With follow-up visits                                                                                     | Without follow-up visits                                                                           |

14. If the HCWs can provide you with vaccination-related consultation services, which of the following modes do you prefer to use for consultation?

- a) Consultation mode A
- b) Consultation mode B
- c) Neither

| <b>Attribute</b>           | <b>Consulting Mode A</b>                                                                           | <b>Counseling Mode B</b>                                                                                  |
|----------------------------|----------------------------------------------------------------------------------------------------|-----------------------------------------------------------------------------------------------------------|
| <b>Consultation-led</b>    | Demand (HCWs begin offering counseling services after patients ask about it)                       | Supplier (HCWs take the initiative to ask about vaccination status and offer counseling services)         |
| <b>Consulting duration</b> | >5 minutes                                                                                         | <5 minutes                                                                                                |
| <b>Consulting content</b>  | Normalized (HCWs conduct comprehensive but not targeted consultations according to the guidelines) | Specialized (HCWs provide targeted consultations according to the characteristics and needs of residents) |
| <b>Consulting mode</b>     | Offline (Face-to-face interviews)                                                                  | Online (e.g. new media or instant messaging)                                                              |
| <b>Telephone follow-up</b> | Without follow-up visits                                                                           | With follow-up visits                                                                                     |

## Supplementary S2. HCWs Questionnaire

### I. Baseline information

1. What is your gender?
  - a) male
  - b) female
2. What is your work age? \_\_\_\_\_ years
3. What is your highest educational level?
  - a) high school and below
  - b) junior college and above
4. What is your professional title?
  - a) primary
  - b) middle
  - c) high
5. What is your work address?  
\_\_\_\_\_ city \_\_\_\_\_ district (county) \_\_\_\_\_ community (township)
6. Which of the following do you think can facilitate you to provide vaccination advice or vaccination consultation services to patients/residents? Please select the three most important ones and **rank** them in the order of most important → least important, and fill in the number below  
28. (1) \_\_\_\_\_ (2) \_\_\_\_\_ (3) \_\_\_\_\_
  - a) skill training
  - b) consulting guidelines,
  - c) vaccination guidelines (more specific)
  - d) subsidies
  - e) honorary certificates
  - f) opportunities for further education

**Instructions:** There will be several exclusive choice questions, each asking you to choose which of two vaccination advice services demanded by residents you prefer, you can also choose "Neither" when you really can't make a choice.

7. If you can provide residents/patients with vaccination-related consultation services, which of the following modes do you prefer to use for consultation?
- a) Consultation mode A
  - b) Consultation mode B
  - c) Neither

| Attribute                  | Consulting Mode A                                                                                         | Counseling Mode B                                                                                  |
|----------------------------|-----------------------------------------------------------------------------------------------------------|----------------------------------------------------------------------------------------------------|
| <b>Consultation-led</b>    | Demand (HCWs begin offering counseling services after patients ask about it)                              | Supplier (HCWs take the initiative to ask about vaccination status and offer counseling services)  |
| <b>Consulting duration</b> | <5 minutes                                                                                                | >5 minutes                                                                                         |
| <b>Consulting content</b>  | Specialized (HCWs provide targeted consultations according to the characteristics and needs of residents) | Normalized (HCWs conduct comprehensive but not targeted consultations according to the guidelines) |
| <b>Consulting mode</b>     | Online (e.g. new media or instant messaging)                                                              | Offline (Face-to-face interviews)                                                                  |
| <b>Telephone follow-up</b> | Without follow-up visits                                                                                  | With follow-up visits                                                                              |

8. If you can provide residents/patients with vaccination-related consultation services, which of the following modes do you prefer to use for consultation?
- a) Consultation mode A
  - b) Consultation mode B
  - c) Neither

| Attribute                  | Consulting Mode A                                                            | Counseling Mode B                                                                                 |
|----------------------------|------------------------------------------------------------------------------|---------------------------------------------------------------------------------------------------|
| <b>Consultation-led</b>    | Demand (HCWs begin offering counseling services after patients ask about it) | Supplier (HCWs take the initiative to ask about vaccination status and offer counseling services) |
| <b>Consulting duration</b> | >5 minutes                                                                   | <5 minutes                                                                                        |
| <b>Consulting content</b>  | Specialized (HCWs provide targeted consultations according                   | Normalized (HCWs conduct comprehensive but not                                                    |

|                            |                                                |                                                     |
|----------------------------|------------------------------------------------|-----------------------------------------------------|
|                            | to the characteristics and needs of residents) | targeted consultations according to the guidelines) |
| <b>Consulting mode</b>     | Online (e.g. new media or instant messaging)   | Offline (Face-to-face interviews)                   |
| <b>Telephone follow-up</b> | Without follow-up visits                       | With follow-up visits                               |

9. If you can provide residents/patients with vaccination-related consultation services, which of the following modes do you prefer to use for consultation?
- Consultation mode A
  - Consultation mode B
  - Neither

| Attribute                  | Consulting Mode A                                                                                         | Counseling Mode B                                                                                  |
|----------------------------|-----------------------------------------------------------------------------------------------------------|----------------------------------------------------------------------------------------------------|
| <b>Consultation-led</b>    | Demand (HCWs begin offering counseling services after patients ask about it)                              | Supplier (HCWs take the initiative to ask about vaccination status and offer counseling services)  |
| <b>Consulting duration</b> | <5 minutes                                                                                                | >5 minutes                                                                                         |
| <b>Consulting content</b>  | Specialized (HCWs provide targeted consultations according to the characteristics and needs of residents) | Normalized (HCWs conduct comprehensive but not targeted consultations according to the guidelines) |
| <b>Consulting mode</b>     | Offline (Face-to-face interviews)                                                                         | Online (e.g. new media or instant messaging)                                                       |
| <b>Telephone follow-up</b> | Without follow-up visits                                                                                  | With follow-up visits                                                                              |

10. If you can provide residents/patients with vaccination-related consultation services, which of the following modes do you prefer to use for consultation?
- Consultation mode A
  - Consultation mode B
  - Neither

| Attribute | Consulting Mode A | Counseling Mode B |
|-----------|-------------------|-------------------|
|-----------|-------------------|-------------------|



|                            |                                                                                                           |                                                                                                    |
|----------------------------|-----------------------------------------------------------------------------------------------------------|----------------------------------------------------------------------------------------------------|
| <b>Consultation-led</b>    | Demand (HCWs begin offering counseling services after patients ask about it)                              | Supplier (HCWs take the initiative to ask about vaccination status and offer counseling services)  |
| <b>Consulting duration</b> | >5 minutes                                                                                                | <5 minutes                                                                                         |
| <b>Consulting content</b>  | Specialized (HCWs provide targeted consultations according to the characteristics and needs of residents) | Normalized (HCWs conduct comprehensive but not targeted consultations according to the guidelines) |
| <b>Consulting mode</b>     | Online (e.g. new media or instant messaging)                                                              | Offline (Face-to-face interviews)                                                                  |
| <b>Telephone follow-up</b> | With follow-up visits                                                                                     | Without follow-up visits                                                                           |

11. If you can provide residents/patients with vaccination-related consultation services, which of the following modes do you prefer to use for consultation?

- a) Consultation mode A
- b) Consultation mode B
- c) Neither

| <b>Attribute</b>           | <b>Consulting Mode A</b>                                                                           | <b>Counseling Mode B</b>                                                                                  |
|----------------------------|----------------------------------------------------------------------------------------------------|-----------------------------------------------------------------------------------------------------------|
| <b>Consultation-led</b>    | Demand (HCWs begin offering counseling services after patients ask about it)                       | Supplier (HCWs take the initiative to ask about vaccination status and offer counseling services)         |
| <b>Consulting duration</b> | <5 minutes                                                                                         | >5 minutes                                                                                                |
| <b>Consulting content</b>  | Normalized (HCWs conduct comprehensive but not targeted consultations according to the guidelines) | Specialized (HCWs provide targeted consultations according to the characteristics and needs of residents) |
| <b>Consulting mode</b>     | Online (e.g. new media or instant messaging)                                                       | Offline (Face-to-face interviews)                                                                         |
| <b>Telephone follow-up</b> | With follow-up visits                                                                              | Without follow-up visits                                                                                  |

12. If you can provide residents/patients with vaccination-related consultation services, which of the

following modes do you prefer to use for consultation?

- a) Consultation mode A
- b) Consultation mode B
- c) Neither

| Attribute                  | Consulting Mode A                                                                                         | Counseling Mode B                                                                                  |
|----------------------------|-----------------------------------------------------------------------------------------------------------|----------------------------------------------------------------------------------------------------|
| <b>Consultation-led</b>    | Demand (HCWs begin offering counseling services after patients ask about it)                              | Supplier (HCWs take the initiative to ask about vaccination status and offer counseling services)  |
| <b>Consulting duration</b> | >5 minutes                                                                                                | <5 minutes                                                                                         |
| <b>Consulting content</b>  | Specialized (HCWs provide targeted consultations according to the characteristics and needs of residents) | Normalized (HCWs conduct comprehensive but not targeted consultations according to the guidelines) |
| <b>Consulting mode</b>     | Offline (Face-to-face interviews)                                                                         | Online (e.g. new media or instant messaging)                                                       |
| <b>Telephone follow-up</b> | With follow-up visits                                                                                     | Without follow-up visits                                                                           |

13. If you can provide residents/patients with vaccination-related consultation services, which of the following modes do you prefer to use for consultation?

- a) Consultation mode A
- b) Consultation mode B
- c) Neither

| Attribute                  | Consulting Mode A                                                                                         | Counseling Mode B                                                                                  |
|----------------------------|-----------------------------------------------------------------------------------------------------------|----------------------------------------------------------------------------------------------------|
| <b>Consultation-led</b>    | Demand (HCWs begin offering counseling services after patients ask about it)                              | Supplier (HCWs take the initiative to ask about vaccination status and offer counseling services)  |
| <b>Consulting duration</b> | <5 minutes                                                                                                | >5 minutes                                                                                         |
| <b>Consulting content</b>  | Specialized (HCWs provide targeted consultations according to the characteristics and needs of residents) | Normalized (HCWs conduct comprehensive but not targeted consultations according to the guidelines) |

|                            |                                   |                                              |
|----------------------------|-----------------------------------|----------------------------------------------|
| <b>Consulting mode</b>     | Offline (Face-to-face interviews) | Online (e.g. new media or instant messaging) |
| <b>Telephone follow-up</b> | With follow-up visits             | Without follow-up visits                     |

14. If you can provide residents/patients with vaccination-related consultation services, which of the following modes do you prefer to use for consultation?

- a) Consultation mode A
- b) Consultation mode B
- c) Neither

| <b>Attribute</b>           | <b>Consulting Mode A</b>                                                                           | <b>Counseling Mode B</b>                                                                                  |
|----------------------------|----------------------------------------------------------------------------------------------------|-----------------------------------------------------------------------------------------------------------|
| <b>Consultation-led</b>    | Demand (HCWs begin offering counseling services after patients ask about it)                       | Supplier (HCWs take the initiative to ask about vaccination status and offer counseling services)         |
| <b>Consulting duration</b> | >5 minutes                                                                                         | <5 minutes                                                                                                |
| <b>Consulting content</b>  | Normalized (HCWs conduct comprehensive but not targeted consultations according to the guidelines) | Specialized (HCWs provide targeted consultations according to the characteristics and needs of residents) |
| <b>Consulting mode</b>     | Offline (Face-to-face interviews)                                                                  | Online (e.g. new media or instant messaging)                                                              |
| <b>Telephone follow-up</b> | Without follow-up visits                                                                           | With follow-up visits                                                                                     |

**Supplementary S3. The consistency test of mixed-effects models in demanders.**

| Property ( <i>Reference</i> )            | Coefficient    |                | SD             |                | Log likelihood | AIC      | BIC      |
|------------------------------------------|----------------|----------------|----------------|----------------|----------------|----------|----------|
|                                          | Mean (SE)      | <i>P</i> value | Mean (SE)      | <i>P</i> value |                |          |          |
| Model 1                                  |                |                |                |                |                |          |          |
| Consulting-led ( <i>Residents</i> )      | 1.954 (0.284)  | <0.001         | 3.111 (0.405)  | <0.001         | -911.691       | 1843.381 | 1904.649 |
| Consulting duration (<5 <i>min</i> )     | -0.104 (0.193) | 0.588          | 1.949 (0.351)  | <0.001         |                |          |          |
| Consulting content ( <i>Normalized</i> ) | 0.835 (0.235)  | <0.001         | -2.298 (0.300) | <0.001         |                |          |          |
| Consulting mode ( <i>Online</i> )        | 0.151 (0.225)  | 0.503          | 2.691 (0.402)  | <0.001         |                |          |          |
| Telephone follow-up ( <i>No</i> )        | 1.123 (0.194)  | <0.001         | 1.973 (0.304)  | <0.001         |                |          |          |
| Model 2                                  |                |                |                |                |                |          |          |
| Consulting-led ( <i>Residents</i> )      | 2.168 (0.375)  | <0.001         | 3.570 (0.511)  | <0.001         | -689.931       | 1399.861 | 1458.782 |
| Consulting duration (<5 <i>min</i> )     | 0.207 (0.223)  | 0.353          | -1.540 (0.333) | <0.001         |                |          |          |
| Consulting content ( <i>Normalized</i> ) | 0.954 (0.303)  | 0.002          | 3.965 (0.544)  | <0.001         |                |          |          |
| Consulting mode ( <i>Online</i> )        | 0.462 (0.267)  | 0.083          | 2.812 (0.408)  | <0.001         |                |          |          |
| Telephone follow-up ( <i>No</i> )        | 1.552 (0.300)  | <0.001         | 2.231 (0.389)  | <0.001         |                |          |          |

Note: Model 1, mixed effect models of all include demanders; Model 2, mixed effects model of the demanders who passed the consistency test. The likelihood-ratio test was used to verify the hypothesis that Model 1 nested within Model 2, and the result rejected the original hypothesis.

**Supplementary S4. The consistency test of mixed-effects models in suppliers.**

| Property ( <i>Reference</i> )            | Coefficient    |                | SD             |                | Log likelihood | AIC      | BIC      |
|------------------------------------------|----------------|----------------|----------------|----------------|----------------|----------|----------|
|                                          | Mean (SE)      | <i>P</i> value | Mean (SE)      | <i>P</i> value |                |          |          |
| Model 1                                  |                |                |                |                |                |          |          |
| Consulting-led ( <i>Patient</i> )        | 0.387 (0.155)  | 0.012          | 2.170 (0.190)  | <0.001         | -1411.590      | 2843.180 | 2908.142 |
| Consulting duration (<5 <i>min</i> )     | -0.019 (0.095) | 0.841          | -0.893 (0.132) | <0.001         |                |          |          |
| Consulting content ( <i>Normalized</i> ) | 0.272 (0.100)  | 0.007          | 1.004 (0.131)  | <0.001         |                |          |          |
| Consulting mode ( <i>Online</i> )        | 0.492 (0.078)  | <0.001         | 0.396 (0.144)  | 0.006          |                |          |          |
| Telephone follow-up ( <i>No</i> )        | 0.873 (0.102)  | <0.001         | 1.014 (0.124)  | <0.001         |                |          |          |
| Model 2                                  |                |                |                |                |                |          |          |
| Consulting-led ( <i>Patient</i> )        | 0.458 (0.224)  | 0.041          | 2.638 (0.257)  | <0.001         | -1051.089      | 2122.177 | 2184.584 |
| Consulting duration (<5 <i>min</i> )     | 0.016 (0.112)  | 0.886          | 0.891 (0.143)  | <0.001         |                |          |          |
| Consulting content ( <i>Normalized</i> ) | 0.409 (0.122)  | 0.001          | 0.998 (0.140)  | <0.001         |                |          |          |
| Consulting mode ( <i>Online</i> )        | 0.540 (0.100)  | <0.001         | 0.649 (0.152)  | <0.001         |                |          |          |
| Telephone follow-up ( <i>No</i> )        | 0.831 (0.126)  | <0.001         | 1.222 (0.161)  | <0.001         |                |          |          |

Note: Model 1, mixed effect models of all include suppliers; Model 2, mixed effects model of the suppliers who passed the consistency test. The likelihood-ratio test was used to verify the hypothesis that Model 1 nested within Model 2, and the result rejected the original hypothesis.
